# Supplementary material for: The Pale Orange Dot: The Spectrum and Habitability of Hazy Archean Earth
Source: PubMed Central journal article supplement — Astrobiology. 2016 Nov 1;16(11):873–99. doi: 10.1089/ast.2015.1422 (PMC5148108; doi:10.1089/ast.2015.1422), 2016-11-01
Supplement: Supp_Table1.pdf [file Supp_Table1.pdf]

Supplementary Table S1: List of reactions with rate constants and sources for the Archean photochemical code. For photolysis reactions at the bottom of the table, the “Reaction Rate Constant” refers to the reaction rate at the top of the atmosphere during a “standard” simulation for  $p\text{CO}_2 = 0.02$ ,  $p\text{CH}_4 = 0.0035$ , 1 bar total pressure (a moderately hazy Case B atmosphere). Refer to Sander et al. (2006) for more information about reaction rate calculations.

| Rxn. # | Reaction                                                               | Reaction Rate Constant                                  | Reference                                  |
|--------|------------------------------------------------------------------------|---------------------------------------------------------|--------------------------------------------|
| 1.     | $\text{OCS} + \text{CH} \rightarrow \text{CO} + \text{HCS}$            | $1.99 \cdot 10^{-10} \times e^{-190/T}$                 | (Zabarnick <i>et al.</i> , 1989)           |
| 2.     | $\text{OCS} + \text{H} \rightarrow \text{CO} + \text{HS}$              | $9.07 \cdot 10^{-12} \times e^{-1940/T}$                | (Lee <i>et al.</i> , 1977)                 |
| 3.     | $\text{OCS} + \text{O} \rightarrow \text{S} + \text{CO}_2$             | $8.3 \cdot 10^{-11} \times e^{-5530/T}$                 | (Singleton and Cvetanovic 1988)            |
| 4.     | $\text{OCS} + \text{O} \rightarrow \text{SO} + \text{CO}$              | $2.1 \cdot 10^{-11} \times e^{-2200/T}$                 | (Toon <i>et al.</i> , 1987)                |
| 5.     | $\text{OCS} + \text{OH} \rightarrow \text{CO}_2 + \text{HS}$           | $1.1 \cdot 10^{-13} \times e^{-1200/T}$                 | (Atkinson <i>et al.</i> , 2004)            |
| 6.     | $\text{OCS} + \text{S} \rightarrow \text{CO} + \text{S}_2$             | $1.5 \cdot 10^{-10} \times e^{-1830/T}$                 | (Schofield 1973)                           |
| 7.     | $\text{OCS} + \text{S} + \text{M} \rightarrow \text{OCS}_2 + \text{M}$ | $8.3 \cdot 10^{-33} \times \text{den}$                  | (Basco and Pearson 1967)                   |
| 8.     | $\text{OCS}_2 + \text{CO} \rightarrow \text{OCS} + \text{OCS}$         | $3.0 \cdot 10^{-12}$                                    | (Zahnle <i>et al.</i> , 2006)              |
| 9.     | $\text{OCS}_2 + \text{S} \rightarrow \text{OCS} + \text{S}_2$          | $2.0 \cdot 10^{-11}$                                    | (Zahnle <i>et al.</i> , 2006)              |
| 10.    | $\text{CH} + \text{CS}_2 \rightarrow \text{HCS} + \text{CS}$           | $3.49 \cdot 10^{-10} \times e^{-40/T}$                  | (Zabarnick <i>et al.</i> , 1989)           |
| 11.    | $\text{CS} + \text{HS} \rightarrow \text{CS}_2 + \text{H}$             | $1.5 \cdot 10^{-13} \times (1 + 0.6 \times \text{den})$ | Assumed same as $k(\text{CO} + \text{OH})$ |
| 12.    | $\text{CS} + \text{O} \rightarrow \text{CO} + \text{S}$                | $2.7 \cdot 10^{-10} \times e^{-760/T}$                  | (Atkinson <i>et al.</i> , 2004)            |
| 13.    | $\text{CS} + \text{O}_2 \rightarrow \text{CO} + \text{SO}$             | $5 \cdot 10^{-20}$                                      | (Wine <i>et al.</i> , 1981)                |
| 14.    | $\text{CS} + \text{O}_2 \rightarrow \text{OCS} + \text{O}$             | $4 \cdot 10^{-19}$                                      | (Wine <i>et al.</i> , 1981)                |
| 15.    | $\text{CS} + \text{O}_3 \rightarrow \text{CO} + \text{SO}_2$           | $3 \cdot 10^{-12}$                                      | (Wine <i>et al.</i> , 1981)                |
| 16.    | $\text{CS} + \text{O}_3 \rightarrow \text{OCS} + \text{O}_2$           | $3 \cdot 10^{-12}$                                      | (Wine <i>et al.</i> , 1981)                |
| 17.    | $\text{CS} + \text{O}_3 \rightarrow \text{SO} + \text{CO}_2$           | $3 \cdot 10^{-12}$                                      | (Wine <i>et al.</i> , 1981)                |
| 18.    | $\text{CS}_2 + \text{O} \rightarrow \text{CO} + \text{S}_2$            | $5.81 \cdot 10^{-14}$                                   | (Singleton and Cvetanovic 1988)            |
| 19.    | $\text{CS}_2 + \text{O} \rightarrow \text{OCS} + \text{S}$             | $3 \cdot 10^{-12} \times e^{-650/T}$                    | (Toon <i>et al.</i> , 1987)                |
| 20.    | $\text{CS}_2 + \text{O} \rightarrow \text{SO} + \text{CS}$             | $3.2 \cdot 10^{-11} \times e^{-650/T}$                  | (Toon <i>et al.</i> , 1987)                |

|     |                                                                              |                                                                                |                                                                               |
|-----|------------------------------------------------------------------------------|--------------------------------------------------------------------------------|-------------------------------------------------------------------------------|
| 21. | $\text{CS}_2 + \text{OH} \rightarrow \text{OCS} + \text{HS}$                 | $2 \cdot 10^{-15}$                                                             | (Atkinson <i>et al.</i> , 2004)                                               |
| 22. | $\text{CS}_2 + \text{S} \rightarrow \text{CS} + \text{S}_2$                  | $1.9 \cdot 10^{-14} \times e^{-580/T} \times (T/300)^{3.97}$                   | (Woiki and Roth 1995)                                                         |
| 23. | $\text{CS}_2 + \text{SO} \rightarrow \text{OCS} + \text{S}_2$                | $2.4 \cdot 10^{-13} \times e^{-2370/T}$                                        | Assumed same as $k(\text{SO}^* + \text{O}_2)$                                 |
| 24. | $\text{CS}_2^* + \text{CS}_2 \rightarrow \text{CS} + \text{CS} + \text{S}_2$ | $1 \cdot 10^{-12}$                                                             | Assumed same as $k(\text{CS}_2^* + \text{CS}_2)$                              |
| 25. | $\text{CS}_2^* + \text{M} \rightarrow \text{CS}_2 + \text{M}$                | $2.5 \cdot 10^{-11}$                                                           | (Wine <i>et al.</i> , 1981)                                                   |
| 26. | $\text{CS}_2^* + \text{O}_2 \rightarrow \text{CS} + \text{SO}_2$             | $1 \cdot 10^{-12}$                                                             | (Wine <i>et al.</i> , 1981)                                                   |
| 27. | $\text{C} + \text{HS} \rightarrow \text{CS} + \text{H}$                      | $4 \cdot 10^{-11}$                                                             | Assumed same as $k(\text{C} + \text{OH})$                                     |
| 28. | $\text{C} + \text{S}_2 \rightarrow \text{CS} + \text{S}$                     | $3.3 \cdot 10^{-11}$                                                           | Assumed same as $k(\text{C} + \text{O}_2)$                                    |
| 29. | $\text{C}_2 + \text{S} \rightarrow \text{C} + \text{CS}$                     | $5 \cdot 10^{-11}$                                                             | Assumed same as $k(\text{C}_2 + \text{O})$                                    |
| 30. | $\text{C}_2 + \text{S}_2 \rightarrow \text{CS} + \text{CS}$                  | $1.5 \cdot 10^{-11} \times e^{-550/T}$                                         | Assumed same as $k(\text{C}_2 + \text{O}_2)$                                  |
| 31. | $\text{CH} + \text{S} \rightarrow \text{CS} + \text{H}$                      | $9.5 \cdot 10^{-11}$                                                           | Assumed same as $k(\text{CH} + \text{CS}_2)$                                  |
| 32. | $\text{CH} + \text{S}_2 \rightarrow \text{CS} + \text{HS}$                   | $5.9 \cdot 10^{-11}$                                                           | Assumed same as $k(\text{CH} + \text{O}_2)$                                   |
| 33. | $\text{CH}_2^1 + \text{S}_2 \rightarrow \text{HCS} + \text{HS}$              | $3 \cdot 10^{-11}$                                                             | Assumed same as $k(\text{CH}_2^1 + \text{O}_2)$                               |
| 34. | $\text{CH}_3 + \text{HCS} \rightarrow \text{CH}_4 + \text{CS}$               | $5.0 \cdot 10^{-11}$                                                           | Assumed same as $k(\text{CH}_3 + \text{HCO})$                                 |
| 35. | $\text{H} + \text{CS} + \text{M} \rightarrow \text{HCS} + \text{M}$          | $2.0 \cdot 10^{-33} \times e^{-850/T} \times \text{den}$                       | Assumed same as $k(\text{H} + \text{CO})$                                     |
| 36. | $\text{H} + \text{HCS} \rightarrow \text{H}_2 + \text{CS}$                   | $1.2 \cdot 10^{-10}$                                                           | Assumed same as $k(\text{H} + \text{HCO})$                                    |
| 37. | $\text{HS} + \text{CO} \rightarrow \text{OCS} + \text{H}$                    | $4.2 \cdot 10^{-14} \times e^{-7650/T}$                                        | (Kurbanov and Mamedov 1995)                                                   |
| 38. | $\text{HS} + \text{HCS} \rightarrow \text{H}_2\text{S} + \text{CS}$          | $2.0 \cdot 10^{-11}$                                                           | Assumed same as $k(\text{HS} + \text{HCO})$                                   |
| 39. | $\text{OCS} + \text{CH} \rightarrow \text{CO} + \text{HCS}$                  | $1.99 \cdot 10^{-10} \times e^{-190/T}$                                        | (Zabarnick <i>et al.</i> , 1989)                                              |
| 40. | $\text{S} + \text{CO} + \text{M} \rightarrow \text{OCS} + \text{M}$          | $6.5 \cdot 10^{-33} \times e^{-2180/T} \times \text{den}$                      | Assumed same as $k(\text{CO} + \text{O})$                                     |
| 41. | $\text{S} + \text{HCS} \rightarrow \text{H} + \text{CS}_2$                   | $5.0 \cdot 10^{-11}$                                                           | Assumed same as $k(\text{O} + \text{HCO} \rightarrow \text{H} + \text{CO}_2)$ |
| 42. | $\text{S} + \text{HCS} \rightarrow \text{HS} + \text{CS}$                    | $5.0 \cdot 10^{-11}$                                                           | Assumed same as $k(\text{O} + \text{HCO} \rightarrow \text{HS} + \text{CO})$  |
| 43. | $2\text{CH}_2^3 \rightarrow \text{C}_2\text{H}_2 + \text{H}_2$               | $5.3 \cdot 10^{-11}$                                                           | (Braun <i>et al.</i> , 1970)                                                  |
| 44. | $\text{C} + \text{H}_2 + \text{M} \rightarrow \text{CH}_2^3 + \text{M}$      | $k_0 = 8.75 \cdot 10^{-31} \times e^{524/T}$<br>$k_\infty = 8.3 \cdot 10^{-1}$ | (Zahnle 1986)                                                                 |
| 45. | $\text{C} + \text{O}_2 \rightarrow \text{CO} + \text{O}$                     | $3.3 \cdot 10^{-11}$                                                           | (Donovan and Husain 1970)                                                     |
| 46. | $\text{C} + \text{OH} \rightarrow \text{CO} + \text{H}$                      | $4 \cdot 10^{-11}$                                                             | (Giguere and Huebner 1978)                                                    |

|     |                                               |                                                                                                                                                                                         |                                                             |
|-----|-----------------------------------------------|-----------------------------------------------------------------------------------------------------------------------------------------------------------------------------------------|-------------------------------------------------------------|
| 47. | $C_2 + CH_4 \rightarrow C_2H + CH_3$          | $5.05 \cdot 10^{-11} \times e^{-297/T}$                                                                                                                                                 | (Pitts <i>et al.</i> , 1982)                                |
| 48. | $C_2 + H_2 \rightarrow C_2H + H$              | $1.77 \cdot 10^{-10} \times e^{-1469/T}$                                                                                                                                                | (Pitts <i>et al.</i> , 1982)                                |
| 49. | $C_2 + O \rightarrow C + CO$                  | $5 \cdot 10^{-11}$                                                                                                                                                                      | (Prasad and Huntress 1980)                                  |
| 50. | $C_2 + O_2 \rightarrow CO + CO$               | $1.5 \cdot 10^{-11} \times e^{-550/T}$                                                                                                                                                  | (Baughcum and Oldenberg 1984)                               |
| 51. | $C_2H + C_2H_2 \rightarrow HCAER + H$         | $1.5 \cdot 10^{-10}$                                                                                                                                                                    | (Stephens <i>et al.</i> , 1987)                             |
| 52. | $C_2H + C_2H_6 \rightarrow C_2H_2 + C_2H_5$   | $3.6 \cdot 10^{-11}$                                                                                                                                                                    | (Lander <i>et al.</i> , 1990)                               |
| 53. | $C_2H + C_3H_8 \rightarrow C_2H_2 + C_3H_7$   | $1.4 \cdot 10^{-11}$                                                                                                                                                                    | (Okabe 1983)                                                |
| 54. | $C_2H + CH_2CCH_2 \rightarrow HCAER2 + H$     | $1.5 \cdot 10^{-10}$                                                                                                                                                                    | (Pavlov <i>et al.</i> , 2001b)                              |
| 55. | $C_2H + CH_4 \rightarrow C_2H_2 + CH_3$       | $6.94 \cdot 10^{-12} \times e^{-250/T}$<br>$k_0 = 2.64 \cdot 10^{-26} \times e^{-721/T} \times (T/300)^{-3.1}$<br>$k_\infty = 3.0 \cdot 10^{-10}$                                       | (Allen <i>et al.</i> , 1992; Lander <i>et al.</i> , 1990)   |
| 56. | $C_2H + H + M \rightarrow C_2H_2 + M$         | $k_\infty = 3.0 \cdot 10^{-10}$                                                                                                                                                         | (Tsang and Hampson 1986)                                    |
| 57. | $C_2H + H_2 \rightarrow C_2H_2 + H$           | $5.58 \cdot 10^{-11} \times e^{-1443/T}$                                                                                                                                                | (Allen <i>et al.</i> , 1992; Stephens <i>et al.</i> , 1987) |
| 58. | $C_2H + O \rightarrow CO + CH$                | $1 \cdot 10^{-10} \times e^{-250/T}$                                                                                                                                                    | (Zahnle 1986)                                               |
| 59. | $C_2H + O_2 \rightarrow CO + HCO$             | $2 \cdot 10^{-11}$<br>$k_0 = 2.6 \cdot 10^{-31}$<br>$k_\infty = 8.3 \cdot 10^{-11} \times e^{-1374/T}$                                                                                  | (Brown and Laufer 1981)                                     |
| 60. | $C_2H_2 + H + M \rightarrow C_2H_3 + M$       | $k_\infty = 8.3 \cdot 10^{-11} \times e^{-1374/T}$                                                                                                                                      | (Romani <i>et al.</i> , 1993)                               |
| 61. | $C_2H_2 + O \rightarrow CH_2^3 + CO$          | $2.9 \cdot 10^{-11} \times e^{-1600/T}$<br>$k_0 = 5.5 \cdot 10^{-30} +$<br>$k_\infty = 8.3 \cdot 10^{-13} \times (T/300)^{-2}$<br>$k_0 = 5.8 \cdot 10^{-31} \times e^{1258/T}$          | (Zahnle 1986)                                               |
| 62. | $C_2H_2 + OH + M \rightarrow C_2H_2OH + M$    | $k_0 = 5.5 \cdot 10^{-30} +$<br>$k_\infty = 8.3 \cdot 10^{-13} \times (T/300)^{-2}$<br>$k_0 = 5.8 \cdot 10^{-31} \times e^{1258/T}$<br>$k_\infty = 1.4 \cdot 10^{-12} \times e^{388/T}$ | (Sander <i>et al.</i> , 2006)                               |
| 63. | $C_2H_2 + OH + M \rightarrow CH_2CO + H + M$  | $k_\infty = 1.4 \cdot 10^{-12} \times e^{388/T}$                                                                                                                                        | (Perry and Williamson 1982)                                 |
| 64. | $C_2H_2 + OH \rightarrow CO + CH_3$           | $2 \cdot 10^{-12} \times e^{-250/T}$                                                                                                                                                    | (Hampson and Garvin 1977)                                   |
| 65. | $C_2H_2OH + H \rightarrow H_2 + CH_2CO$       | $3.3 \cdot 10^{-11} \times e^{-2000/T}$                                                                                                                                                 | (Miller <i>et al.</i> , 1982)                               |
| 66. | $C_2H_2OH + H \rightarrow H_2O + C_2H_2$      | $5 \cdot 10^{-11}$                                                                                                                                                                      | (Miller <i>et al.</i> , 1982)                               |
| 67. | $C_2H_2OH + O \rightarrow OH + CH_2CO$        | $3.3 \cdot 10^{-11} \times e^{-2000/T}$                                                                                                                                                 | (Miller <i>et al.</i> , 1982)                               |
| 68. | $C_2H_2OH + OH \rightarrow H_2O + CH_2CO$     | $1.7 \cdot 10^{-11} \times e^{-1000/T}$                                                                                                                                                 | (Miller <i>et al.</i> , 1982)                               |
| 69. | $C_2H_3 + C_2H_3 \rightarrow C_2H_4 + C_2H_2$ | $2.4 \cdot 10^{-11}$                                                                                                                                                                    | (Fahr <i>et al.</i> , 1991)                                 |
| 70. | $C_2H_3 + C_2H_5 \rightarrow C_2H_4 + C_2H_4$ | $3 \cdot 10^{-12}$                                                                                                                                                                      | (Laufer <i>et al.</i> , 1983)                               |

|     |                                                     |                                                                                                                                                       |                                  |
|-----|-----------------------------------------------------|-------------------------------------------------------------------------------------------------------------------------------------------------------|----------------------------------|
| 71. | $C_2H_3 + C_2H_5 + M \rightarrow CH_3 + C_3H_5 + M$ | $k_0 = 1.9 \cdot 10^{-27}$<br>$k_\infty = 2.5 \cdot 10^{-11}$                                                                                         | (Romani <i>et al.</i> , 1993)    |
| 72. | $C_2H_3 + C_2H_6 \rightarrow C_2H_4 + C_2H_5$       | $3 \cdot 10^{-13} \times e^{-5170/T}$                                                                                                                 | (Kasting <i>et al.</i> , 1983)   |
| 73. | $C_2H_3 + CH_3 \rightarrow C_2H_2 + CH_4$           | $3.4 \cdot 10^{-11}$<br>$k_0 = 1.3 \cdot 10^{-22}$<br>$k_\infty = 1.2 \cdot 10^{-10}$                                                                 | (Fahr <i>et al.</i> , 1991)      |
| 74. | $C_2H_3 + CH_3 + M \rightarrow C_3H_6 + M$          |                                                                                                                                                       | (Raymond <i>et al.</i> , 2006)   |
| 75. | $C_2H_3 + CH_4 \rightarrow C_2H_4 + CH_3$           | $2.4 \cdot 10^{-24} \times e^{-2754/T} \times T^{4.02}$                                                                                               | (Tsang and Hampson 1986)         |
| 76. | $C_2H_3 + H \rightarrow C_2H_2 + H_2$               | $3.3 \cdot 10^{-11}$                                                                                                                                  | (Warnatz 1984)                   |
| 77. | $C_2H_3 + H_2 \rightarrow C_2H_4 + H$               | $2.6 \cdot 10^{-13} \times e^{-2646/T}$                                                                                                               | (Allen <i>et al.</i> , 1992)     |
| 78. | $C_2H_3 + O \rightarrow CH_2CO + H$                 | $5.5 \cdot 10^{-11}$                                                                                                                                  | (Hoyermann <i>et al.</i> , 1981) |
| 79. | $C_2H_3 + OH \rightarrow C_2H_2 + H_2O$             | $8.3 \cdot 10^{-12}$<br>$k_0 = 2.15 \cdot 10^{-29} \times e^{-349/T}$<br>$k_\infty = 4.95 \cdot 10^{-11} \times e^{-1051/T}$                          | (Benson and Haugen 1967)         |
| 80. | $C_2H_4 + H + M \rightarrow C_2H_5 + M$             |                                                                                                                                                       | (Lightfoot and Pilling 1987)     |
| 81. | $C_2H_4 + O \rightarrow HCO + CH_3$                 | $5.5 \cdot 10^{-12} \times e^{-565/T}$<br>$k_0 = 1.0 \cdot 10^{-28} \times (T/300)^{4.5}$<br>$k_\infty = 8.8 \cdot 10^{-12} \times (T/300)^{0.85}$    | (Hampson and Garvin 1977)        |
| 82. | $C_2H_4 + OH + M \rightarrow C_2H_4OH + M$          |                                                                                                                                                       | (Sander <i>et al.</i> , 2006)    |
| 83. | $C_2H_4 + OH \rightarrow H_2CO + CH_3$              | $2.2 \cdot 10^{-12} \times e^{385/T}$                                                                                                                 | (Hampson and Garvin 1977)        |
| 84. | $C_2H_4OH + H \rightarrow H_2 + CH_3CHO$            | $3.3 \cdot 10^{-11} \times e^{-2000/T}$                                                                                                               | (Zahnle and Kasting 1986)        |
| 85. | $C_2H_4OH + H \rightarrow H_2O + C_2H_4$            | $5 \cdot 10^{-11}$                                                                                                                                    | (Miller <i>et al.</i> , 1982)    |
| 86. | $C_2H_4OH + O \rightarrow OH + CH_3CHO$             | $3.3 \cdot 10^{-11} \times e^{-2000/T}$                                                                                                               | (Zahnle and Kasting 1986)        |
| 87. | $C_2H_4OH + OH \rightarrow H_2O + CH_3CHO$          | $1.7 \cdot 10^{-11} \times e^{-1000/T}$                                                                                                               | (Zahnle and Kasting 1986)        |
| 88. | $C_2H_5 + C_2H_3 \rightarrow C_2H_6 + C_2H_2$       | $6 \cdot 10^{-12}$                                                                                                                                    | (Laufer <i>et al.</i> , 1983)    |
| 89. | $C_2H_5 + C_2H_5 \rightarrow C_2H_6 + C_2H_4$       | $2.3 \cdot 10^{-12}$                                                                                                                                  | (Tsang and Hampson 1986)         |
| 90. | $C_2H_5 + CH_3 \rightarrow C_2H_4 + CH_4$           | $1.88 \cdot 10^{-12} \times (T/300)^{-0.5}$<br>$k_0 = 3.9 \cdot 10^{-10} \times (T/300)^{2.5}$<br>$k_\infty = 1.4 \cdot 10^{-8} \times (T/300)^{0.5}$ | (Romani <i>et al.</i> , 1993)    |
| 91. | $C_2H_5 + CH_3 + M \rightarrow C_3H_8 + M$          |                                                                                                                                                       | (Romani <i>et al.</i> , 1993)    |
| 92. | $C_2H_5 + H \rightarrow C_2H_4 + H_2$               | $3 \cdot 10^{-12}$<br>$k_0 = 5.5 \cdot 10^{-23} \times e^{-1040/T}$<br>$k_\infty = 1.5 \cdot 10^{-10}$                                                | (Tsang and Hampson 1986)         |
| 93. | $C_2H_5 + H + M \rightarrow C_2H_6 + M$             |                                                                                                                                                       | (Gladstone <i>et al.</i> , 1996) |

|      |                                                    |                                                                                                                              |                                                                                                  |
|------|----------------------------------------------------|------------------------------------------------------------------------------------------------------------------------------|--------------------------------------------------------------------------------------------------|
| 94.  | $C_2H_5 + H \rightarrow CH_3 + CH_3$               | $6.00 \cdot 10^{-11}$                                                                                                        | (Baluch, 1992)                                                                                   |
| 95.  | $C_2H_5 + HCO \rightarrow C_2H_6 + CO$             | $1 \cdot 10^{-10}$                                                                                                           | (Pavlov <i>et al.</i> , 2001b)                                                                   |
| 96.  | $C_2H_5 + HNO \rightarrow C_2H_6 + NO$             | $3 \cdot 10^{-14}$                                                                                                           | (Pavlov <i>et al.</i> , 2001b)                                                                   |
| 97.  | $C_2H_5 + O \rightarrow CH_3 + HCO + H$            | $3.0 \cdot 10^{-11}$                                                                                                         | (Tsang and Hampson 1986)                                                                         |
| 98.  | $C_2H_5 + O \rightarrow CH_3CHO + H$               | $1.33 \cdot 10^{-10}$                                                                                                        | (Tsang and Hampson 1986)                                                                         |
| 99.  | $C_2H_5 + O \rightarrow H_2CO + CH_3$              | $2.67 \cdot 10^{-11}$                                                                                                        | (Tsang and Hampson, 1986)                                                                        |
| 100. | $C_2H_5 + O_2 + M \rightarrow CH_3 + HCO + OH + M$ | $k_0 = 1.5 \cdot 10^{-28} \times (T/300)^{3.0}$<br>$k_\infty = 1.9 \cdot 10^{-11}$                                           | (Sander <i>et al.</i> , 2006)                                                                    |
| 101. | $C_2H_5 + OH \rightarrow CH_3CHO + H_2$            | $1 \cdot 10^{-10}$                                                                                                           | (Pavlov <i>et al.</i> , 2001b)                                                                   |
| 102. | $C_2H_5 + OH \rightarrow C_2H_4 + H_2O$            | $4.0 \cdot 10^{-11}$                                                                                                         | (Pavlov <i>et al.</i> , 2001b)                                                                   |
| 103. | $C_2H_6 + O \rightarrow C_2H_5 + OH$               | $8.62 \cdot 10^{-12} \times e^{-2920/T} \times (T/300)^{1.5}$                                                                | (Baulch <i>et al.</i> , 1994)                                                                    |
| 104. | $C_2H_6 + O^1D \rightarrow C_2H_5 + OH$            | $6.29 \cdot 10^{-10}$                                                                                                        | (Matsumi <i>et al.</i> , 1993)                                                                   |
| 105. | $C_2H_6 + OH \rightarrow C_2H_5 + H_2O$            | $8.7 \cdot 10^{-12} \times e^{-1070/T}$<br>$k_0 = 1.7 \cdot 10^{-26}$<br>$k_\infty = 1.5 \cdot 10^{-10}$                     | (Sander <i>et al.</i> , 2006)                                                                    |
| 106. | $C_3H_2 + H + M \rightarrow C_3H_3 + M$            | $k_0 = 1.7 \cdot 10^{-26}$<br>$k_\infty = 1.5 \cdot 10^{-10}$                                                                | (Yung <i>et al.</i> , 1984)                                                                      |
| 107. | $C_3H_3 + H + M \rightarrow CH_2CCH_2 + M$         | $k_0 = 1.7 \cdot 10^{-26}$<br>$k_\infty = 1.5 \cdot 10^{-10}$                                                                | (Yung <i>et al.</i> , 1984)                                                                      |
| 108. | $C_3H_3 + H + M \rightarrow CH_3C_2H + M$          | $k_0 = 1.7 \cdot 10^{-26}$<br>$k_\infty = 1.5 \cdot 10^{-10}$                                                                | (Yung <i>et al.</i> , 1984)                                                                      |
| 109. | $C_3H_5 + CH_3 \rightarrow CH_2CCH_2 + CH_4$       | $4.5 \cdot 10^{-12}$                                                                                                         | (Yung <i>et al.</i> , 1984)                                                                      |
| 110. | $C_3H_5 + CH_3 \rightarrow CH_3C_2H + CH_4$        | $4.5 \cdot 10^{-12}$<br>$k_0 = 1.0 \cdot 10^{-28}$<br>$k_\infty = 1.0 \cdot 10^{-11}$                                        | (Yung <i>et al.</i> , 1984)                                                                      |
| 111. | $C_3H_5 + H + M \rightarrow C_3H_6 + M$            | $k_\infty = 1.0 \cdot 10^{-11}$                                                                                              | (Yung <i>et al.</i> , 1984)                                                                      |
| 112. | $C_3H_5 + H \rightarrow CH_2CCH_2 + H_2$           | $1.5 \cdot 10^{-11}$                                                                                                         | (Yung <i>et al.</i> , 1984)                                                                      |
| 113. | $C_3H_5 + H \rightarrow CH_3C_2H + H_2$            | $1.5 \cdot 10^{-11}$                                                                                                         | (Yung <i>et al.</i> , 1984)                                                                      |
| 114. | $C_3H_5 + H \rightarrow CH_4 + C_2H_2$             | $1.5 \cdot 10^{-11}$<br>$k_0 = 2.15 \cdot 10^{-29} \times e^{-349/T}$<br>$k_\infty = 4.95 \cdot 10^{-11} \times e^{-1051/T}$ | (Yung <i>et al.</i> , 1984)<br>(Pavlov <i>et al.</i> , 2001b)<br>assumed same as $k(C_2H_4 + H)$ |
| 115. | $C_3H_6 + H + M \rightarrow C_3H_7 + M$            | $k_\infty = 4.95 \cdot 10^{-11} \times e^{-1051/T}$                                                                          |                                                                                                  |
| 116. | $C_3H_6 + O \rightarrow CH_3 + CH_3CO$             | $4.1 \cdot 10^{-12} \times e^{-38/T}$                                                                                        | (Hampson and Garvin 1977)                                                                        |

|     |                                                 |                                                                                                                                                |                                  |
|-----|-------------------------------------------------|------------------------------------------------------------------------------------------------------------------------------------------------|----------------------------------|
| 117 | $C_3H_6 + O \rightarrow CH_3 + CH_3 + CO$       | $4.1 \cdot 10^{-12} e^{-38/T}$                                                                                                                 | Hampson and Garvin (1977)        |
| 118 | $C_3H_6 + OH \rightarrow CH_3CHO + CH_3$        | $4.1 \cdot 10^{-12} \times e^{540/T}$                                                                                                          | (Hampson and Garvin 1977)        |
| 119 | $C_3H_7 + CH_3 \rightarrow C_3H_6 + CH_4$       | $2.5 \cdot 10^{-12} \times e^{-200/T}$                                                                                                         | (Yung <i>et al.</i> , 1984)      |
| 120 | $C_3H_7 + H \rightarrow CH_3 + C_2H_5$          | $7.95 \cdot 10^{-11} \times e^{-127/T}$                                                                                                        | (Pavlov <i>et al.</i> , 2001b)   |
| 121 | $C_3H_7 + O \rightarrow C_2H_5CHO + H$          | $1.1 \cdot 10^{-10}$                                                                                                                           | (Pavlov <i>et al.</i> , 2001b)   |
| 122 | $C_3H_7 + OH \rightarrow C_2H_5CHO + H_2$       | $1.1 \cdot 10^{-10}$<br>$k_0 = 1.6 \cdot 10^{-11} \times e^{-2900/T}$<br>$k_\infty = 2.2 \cdot 10^{-11} \times e^{-2200/T}$                    | (Pavlov <i>et al.</i> , 2001b)   |
| 123 | $C_3H_8 + O + M \rightarrow C_3H_7 + OH + M$    |                                                                                                                                                | (Hampson and Garvin 1977)        |
| 124 | $C_3H_8 + O^1D \rightarrow C_3H_7 + OH$         | $1.4 \cdot 10^{-10}$                                                                                                                           | (Pavlov <i>et al.</i> , 2001b)   |
| 125 | $C_3H_8 + OH \rightarrow C_3H_7 + H_2O$         | $1.1 \cdot 10^{-11} \times e^{-700/T}$<br>$k_0 = 2.15 \cdot 10^{-29} \times e^{-349/T}$<br>$k_\infty = 4.95 \cdot 10^{-11} \times e^{-1051/T}$ | (DeMore <i>et al.</i> , 1992)    |
| 126 | $CH + C_2H_2 + M \rightarrow C_3H_2 + H + M$    | $k_0 = 1.75 \cdot 10^{-10} \times e^{61/T}$                                                                                                    | (Romani <i>et al.</i> , 1993)    |
|     | $CH + C_2H_4 + M \rightarrow CH_2CCH_2 + H + M$ | $k_\infty = 5.3 \cdot 10^{-10}$<br>$k_0 = 1.75 \cdot 10^{-10} \times e^{61/T}$                                                                 | (Romani <i>et al.</i> , 1993)    |
| 127 | M                                               |                                                                                                                                                |                                  |
| 128 | $CH + C_2H_4 + M \rightarrow CH_3C_2H + H + M$  | $k_\infty = 5.3 \cdot 10^{-10}$<br>$k_0 = 2.5 \cdot 10^{-11} \times e^{200/T}$                                                                 | (Romani <i>et al.</i> , 1993)    |
| 129 | $CH + CH_4 + M \rightarrow C_2H_4 + H + M$      | $k_\infty = 1.7 \cdot 10^{-10}$                                                                                                                | (Romani <i>et al.</i> , 1993)    |
| 130 | $CH + CO_2 \rightarrow HCO + CO$                | $5.9 \cdot 10^{-12} \times e^{-350/T}$                                                                                                         | (Berman <i>et al.</i> , 1982)    |
| 131 | $CH + H \rightarrow C + H_2$                    | $1.4 \cdot 10^{-11}$                                                                                                                           | (Becker <i>et al.</i> , 1989)    |
| 132 | $CH + H_2 \rightarrow CH_2^3 + H$               | $2.38 \cdot 10^{-10} \times e^{-1760/T}$<br>$k_0 = 8.75 \cdot 10^{-31} \times e^{524/T}$<br>$k_\infty = 8.3 \cdot 10^{-11}$                    | (Zabarnick <i>et al.</i> , 1986) |
| 133 | $CH + H_2 + M \rightarrow CH_3 + M$             |                                                                                                                                                | (Romani <i>et al.</i> , 1993)    |
| 134 | $CH + O \rightarrow CO + H$                     | $9.5 \cdot 10^{-11}$                                                                                                                           | (Messing <i>et al.</i> , 1981)   |
| 135 | $CH + O_2 \rightarrow CO + OH$                  | $5.9 \cdot 10^{-11}$                                                                                                                           | (Butler <i>et al.</i> , 1981)    |
| 136 | $CH_2^1 + CH_4 \rightarrow CH_3 + CH_3$         | $7.14 \cdot 10^{-12} \times e^{-5050/T}$                                                                                                       | (Böhland <i>et al.</i> , 1985)   |
| 137 | $CH_2^1 + CO_2 \rightarrow H_2CO + CO$          | $1 \cdot 10^{-12}$                                                                                                                             | (Zahnle 1986)                    |
| 138 | $CH_2^1 + H_2 \rightarrow CH_2^3 + H_2$         | $1.26 \cdot 10^{-11}$                                                                                                                          | (Romani <i>et al.</i> , 1993)    |
| 139 | $CH_2^1 + H_2 \rightarrow CH_3 + H$             | $5 \cdot 10^{-15}$                                                                                                                             | (Tsang and Hampson 1986)         |

|     |                                                                                                        |                                                                                                                                                          |                                                 |
|-----|--------------------------------------------------------------------------------------------------------|----------------------------------------------------------------------------------------------------------------------------------------------------------|-------------------------------------------------|
| 140 | $\text{CH}_2^1 + \text{M} \rightarrow \text{CH}_2^3 + \text{M}$                                        | $8.8 \cdot 10^{-12}$                                                                                                                                     | (Ashfold <i>et al.</i> , 1981)                  |
| 141 | $\text{CH}_2^1 + \text{O}_2 \rightarrow \text{HCO} + \text{OH}$                                        | $3 \cdot 10^{-11}$                                                                                                                                       | (Ashfold <i>et al.</i> , 1981)                  |
| 142 | $\text{CH}_2^3 + \text{C}_2\text{H}_2 + \text{M} \rightarrow \text{CH}_2\text{CCH}_2 + \text{M}$       | $k_0 = 3.8 \cdot 10^{-25}$<br>$k_\infty = 3.7 \cdot 10^{-12}$                                                                                            | (Laufer 1981; Laufer <i>et al.</i> , 1983)      |
| 143 | $\text{CH}_2^3 + \text{C}_2\text{H}_2 + \text{M} \rightarrow \text{CH}_3\text{C}_2\text{H} + \text{M}$ | $k_0 = 3.8 \cdot 10^{-25}$<br>$k_\infty = 2.2 \cdot 10^{-12}$                                                                                            | (Laufer 1981; Laufer <i>et al.</i> , 1983)      |
| 144 | $\text{CH}_2^3 + \text{C}_2\text{H}_3 \rightarrow \text{CH}_3 + \text{C}_2\text{H}_2$                  | $3 \cdot 10^{-11}$                                                                                                                                       | (Tsang and Hampson 1986)                        |
| 145 | $\text{CH}_2^3 + \text{C}_2\text{H}_5 \rightarrow \text{CH}_3 + \text{C}_2\text{H}_4$                  | $3 \cdot 10^{-11}$                                                                                                                                       | (Tsang and Hampson 1986)                        |
| 146 | $\text{CH}_2^3 + \text{CH}_3 \rightarrow \text{C}_2\text{H}_4 + \text{H}$                              | $7 \cdot 10^{-11}$<br>$k_0 = 1.0 \cdot 10^{-28}$<br>$k_\infty = 1.0 \cdot 10^{-15}$                                                                      | (Tsang and Hampson 1986)                        |
| 147 | $\text{CH}_2^3 + \text{CO} + \text{M} \rightarrow \text{CH}_2\text{CO} + \text{M}$                     | $k_\infty = 1.0 \cdot 10^{-15}$                                                                                                                          | (Yung <i>et al.</i> , 1984)                     |
| 148 | $\text{CH}_2^3 + \text{CO}_2 \rightarrow \text{H}_2\text{CO} + \text{CO}$                              | $1.0 \cdot 10^{-14}$                                                                                                                                     | (Laufer 1981)                                   |
| 149 | $\text{CH}_2^3 + \text{H} \rightarrow \text{CH} + \text{H}_2$                                          | $4.7 \cdot 10^{-10} \times e^{-370/T}$<br>$k_0 = 3.1 \cdot 10^{-30} \times e^{457/T}$<br>$k_\infty = 1.5 \cdot 10^{-10}$                                 | (Zabarnick <i>et al.</i> , 1986)                |
| 150 | $\text{CH}_2^3 + \text{H} + \text{M} \rightarrow \text{CH}_3 + \text{M}$                               | $k_\infty = 1.5 \cdot 10^{-10}$                                                                                                                          | (Gladstone <i>et al.</i> , 1996)                |
| 151 | $\text{CH}_2^3 + \text{O} \rightarrow \text{CH} + \text{OH}$                                           | $8 \cdot 10^{-12}$                                                                                                                                       | (Huebner and Giguere 1980)                      |
| 152 | $\text{CH}_2^3 + \text{O} \rightarrow \text{CO} + \text{HH}$                                           | $8.3 \cdot 10^{-11}$                                                                                                                                     | (Homann and Wellmann 1983)                      |
| 153 | $\text{CH}_2^3 + \text{O} \rightarrow \text{HCO} + \text{H}$                                           | $1 \cdot 10^{-11}$                                                                                                                                       | (Huebner and Giguere 1980)                      |
| 154 | $\text{CH}_2^3 + \text{O}_2 \rightarrow \text{HCO} + \text{OH}$                                        | $4.1 \cdot 10^{-11} \times e^{-750/T}$                                                                                                                   | (Baulch <i>et al.</i> , 1994)                   |
| 155 | $\text{CH}_2^3 + \text{S}_2 \rightarrow \text{HCS} + \text{HS}$                                        | $4.1 \cdot 10^{-11} e^{-750/T}$                                                                                                                          | Assumed same as $k(\text{CH}_2^3 + \text{O}_2)$ |
| 156 | $\text{CH}_2\text{CCH}_2 + \text{H} \rightarrow \text{C}_3\text{H}_5$                                  | $k_0 = 8.9 \cdot 10^{-29} \times e^{-1225/T} \times (\text{T}/300)^{-2.0}$<br>$k_\infty = 1.4 \cdot 10^{-11} \times e^{-1000/T}$                         | (Yung <i>et al.</i> , 1984)                     |
| 157 | $\text{CH}_2\text{CCH}_2 + \text{H} \rightarrow \text{CH}_3 + \text{C}_2\text{H}_2$                    | $k_0 = 8.9 \cdot 10^{-29} \times e^{-1225/T} \times (\text{T}/300)^{-2.0}$<br>$k_\infty = 9.7 \cdot 10^{-13} \times e^{-1550/T}$                         | (Yung <i>et al.</i> , 1984)                     |
| 158 | $\text{CH}_2\text{CCH}_2 + \text{H} \rightarrow \text{CH}_3\text{C}_2\text{H} + \text{H}$              | $1 \cdot 10^{-11} \times e^{-1000/T}$                                                                                                                    | (Yung <i>et al.</i> , 1984)                     |
| 159 | $\text{CH}_2\text{CO} + \text{H} \rightarrow \text{CH}_3 + \text{CO}$                                  | $1.9 \cdot 10^{-11} \times e^{-1725/T}$                                                                                                                  | (Michael <i>et al.</i> , 1979)                  |
| 160 | $\text{CH}_2\text{CO} + \text{O} \rightarrow \text{H}_2\text{CO} + \text{CO}$                          | $3.3 \cdot 10^{-11}$                                                                                                                                     | (Lee 1980; Miller <i>et al.</i> , 1982)         |
| 161 | $\text{CH}_3 + \text{C}_2\text{H}_3 \rightarrow \text{C}_3\text{H}_5 + \text{H}$                       | $2.4 \cdot 10^{-13}$<br>$k_0 = 4.0 \cdot 10^{-24} \times e^{-1390/T} \times (\text{T}/300)^{-7.0}$<br>$k_\infty = 1.79 \cdot 10^{-10} \times e^{-329/T}$ | (Romani <i>et al.</i> , 1993)                   |
| 162 | $\text{CH}_3 + \text{CH}_3 + \text{M} \rightarrow \text{C}_2\text{H}_6 + \text{M}$                     | $k_\infty = 1.79 \cdot 10^{-10} \times e^{-329/T}$                                                                                                       | (Wagner and Wardlaw 1988)                       |

|     |                                                                                                   |                                                                                                                                                                          |                                                       |
|-----|---------------------------------------------------------------------------------------------------|--------------------------------------------------------------------------------------------------------------------------------------------------------------------------|-------------------------------------------------------|
| 163 | $\text{CH}_3 + \text{CO} + \text{M} \rightarrow \text{CH}_3\text{CO} + \text{M}$                  | $1.4 \cdot 10^{-32} \times e^{-3000/T} \times \text{den}$<br>$k_0 = 1.0 \cdot 10^{-28} \times (T/298)^{-1.80}$<br>$k_\infty = 2.0 \cdot 10^{-10} \times (T/298)^{-0.40}$ | (Watkins and Word 1974)                               |
| 164 | $\text{CH}_3 + \text{H} + \text{M} \rightarrow \text{CH}_4 + \text{M}$                            |                                                                                                                                                                          | (Baulch <i>et al.</i> , 1994; Tsang and Hampson 1986) |
| 165 | $\text{CH}_3 + \text{H}_2\text{CO} \rightarrow \text{CH}_4 + \text{HCO}$                          | $1.60 \cdot 10^{-16} \times e^{899/T} \times (T/298)^{6.10}$                                                                                                             | (Baulch <i>et al.</i> , 1994)                         |
| 166 | $\text{CH}_3 + \text{HCO} \rightarrow \text{CH}_4 + \text{CO}$                                    | $5.0 \cdot 10^{-11}$                                                                                                                                                     | (Tsang and Hampson 1986)                              |
| 167 | $\text{CH}_3 + \text{HNO} \rightarrow \text{CH}_4 + \text{NO}$                                    | $3.3 \cdot 10^{-12} \times e^{-1000/T}$                                                                                                                                  | (Choi and Lin 2005)                                   |
| 168 | $\text{CH}_3 + \text{O} \rightarrow \text{H}_2\text{CO} + \text{H}$                               | $1.1 \cdot 10^{-10}$<br>$k_0 = 4.5 \cdot 10^{-31} \times (T/300)^{-3.0}$<br>$k_\infty = 1.8 \cdot 10^{-12} \times (T/300)^{-1.7}$                                        | (Sander <i>et al.</i> , 2006)                         |
| 169 | $\text{CH}_3 + \text{O}_2 \rightarrow \text{H}_2\text{CO} + \text{OH}$                            |                                                                                                                                                                          | (Sander <i>et al.</i> , 2006)                         |
| 170 | $\text{CH}_3 + \text{O}_3 \rightarrow \text{H}_2\text{CO} + \text{HO}_2$                          | $5.4 \cdot 10^{-12} \times e^{-220/T}$                                                                                                                                   | (Sander <i>et al.</i> , 2006)                         |
| 171 | $\text{CH}_3 + \text{O}_3 \rightarrow \text{CH}_3\text{O} + \text{O}_2$                           | $5.4 \cdot 10^{-12} e^{-220/T}$                                                                                                                                          | (Sander <i>et al.</i> , 2006)                         |
| 172 | $\text{CH}_2^3 + \text{CH}_2^3 \rightarrow \text{CH}_3 + \text{C}_2\text{H}_2$                    | $3 \cdot 10^{-11}$                                                                                                                                                       | Tsang and Hampson (1986)                              |
| 173 | $\text{CH}_3 + \text{OH} \rightarrow \text{CH}_3\text{O} + \text{H}$                              | $9.3 \cdot 10^{-11} \times e^{-1606/T} \times (T/298)$                                                                                                                   | (Jasper <i>et al.</i> , 2007)                         |
| 174 | $\text{CH}_3 + \text{OH} \rightarrow \text{CO} + \text{H}_2 + \text{H}_2$                         | $6.7 \cdot 10^{-12}$<br>$k_0 = 8.88 \cdot 10^{-29} \times e^{-1225/T} \times (T/300)^{-2}$<br>$k_\infty = 9.7 \cdot 10^{-12} \times e^{-1550/T}$                         | (Yung <i>et al.</i> , 1984)                           |
| 175 | $\text{CH}_3\text{C}_2\text{H} + \text{H} + \text{M} \rightarrow \text{C}_3\text{H}_5 + \text{M}$ | $k_0 = 8.88 \cdot 10^{-29} \times e^{-1225/T} \times (T/300)^{-2}$<br>$k_\infty = 9.7 \cdot 10^{-12} \times e^{-1550/T}$                                                 | (Whytock <i>et al.</i> , 1976)                        |
| 176 | $\text{CH}_3\text{C}_2\text{H} + \text{H} \rightarrow \text{CH}_3 + \text{C}_2\text{H}_2$         |                                                                                                                                                                          | (Zahnle 1986)                                         |
| 177 | $\text{CH}_3\text{CHO} + \text{CH}_3 \rightarrow \text{CH}_3\text{CO} + \text{CH}_4$              | $2.8 \cdot 10^{-11} \times e^{-1540/T}$                                                                                                                                  | (Zahnle 1986)                                         |
| 178 | $\text{CH}_3\text{CHO} + \text{H} \rightarrow \text{CH}_3\text{CO} + \text{H}_2$                  | $2.8 \cdot 10^{-11} \times e^{-1540/T}$                                                                                                                                  | (Zahnle 1986)                                         |
| 179 | $\text{CH}_3\text{CHO} + \text{O} \rightarrow \text{CH}_3\text{CO} + \text{OH}$                   | $5.8 \cdot 10^{-13}$                                                                                                                                                     | (Washida 1981)                                        |
| 180 | $\text{CH}_3\text{CHO} + \text{OH} \rightarrow \text{CH}_3\text{CO} + \text{H}_2\text{O}$         | $1.6 \cdot 10^{-11}$                                                                                                                                                     | (Niki <i>et al.</i> , 1978)                           |
| 181 | $\text{CH}_3\text{CO} + \text{CH}_3 \rightarrow \text{C}_2\text{H}_6 + \text{CO}$                 | $5.4 \cdot 10^{-11}$                                                                                                                                                     | (Adachi <i>et al.</i> , 1981)                         |
| 182 | $\text{CH}_3\text{CO} + \text{CH}_3 \rightarrow \text{CH}_4 + \text{CH}_2\text{CO}$               | $8.6 \cdot 10^{-11}$                                                                                                                                                     | (Adachi <i>et al.</i> , 1981)                         |
| 183 | $\text{CH}_3\text{CO} + \text{H} \rightarrow \text{CH}_4 + \text{CO}$                             | $1 \cdot 10^{-10}$                                                                                                                                                       | (Zahnle 1986)                                         |
| 184 | $\text{CH}_3\text{CO} + \text{O} \rightarrow \text{H}_2\text{CO} + \text{HCO}$                    | $5 \cdot 10^{-11}$                                                                                                                                                       | (Zahnle 1986)                                         |
| 185 | $\text{CH}_3\text{O} + \text{CO} \rightarrow \text{CH}_3 + \text{CO}_2$                           | $2.6 \cdot 10^{-11} \times e^{-5940/T}$                                                                                                                                  | (Wen <i>et al.</i> , 1989)                            |
| 186 | $\text{CH}_3\text{O}_2 + \text{H} \rightarrow \text{CH}_4 + \text{O}_2$                           | $1.4 \cdot 10^{-11}$                                                                                                                                                     | (Tsang and Hampson 1986)                              |



|     |                                                                                         |                                                                                                               |                                   |
|-----|-----------------------------------------------------------------------------------------|---------------------------------------------------------------------------------------------------------------|-----------------------------------|
| 187 | $\text{CH}_3\text{O}_2 + \text{H} \rightarrow \text{H}_2\text{O} + \text{H}_2\text{CO}$ | $1 \cdot 10^{-11}$                                                                                            | (Zahnle <i>et al.</i> , 2006)     |
| 188 | $\text{CH}_3\text{O} + \text{NO} \rightarrow \text{HNO} + \text{H}_2\text{CO}$          | $2.3 \cdot 10^{-12} \times (300/T)^{0.7}$                                                                     | IUPAC datasheet                   |
| 189 | $\text{NO}_2 + \text{CH}_3\text{O} \rightarrow \text{H}_2\text{CO} + \text{HNO}_2$      | $9.6 \cdot 10^{-12} e^{-1150/T}$                                                                              | IUPAC datasheet                   |
| 190 | $\text{CH}_3\text{O}_2 + \text{O} \rightarrow \text{H}_2\text{CO} + \text{HO}_2$        | $1 \cdot 10^{-11}$                                                                                            | (Vaghjiani and Ravishankara 1990) |
| 191 | $\text{CH}_3\text{O}_2 + \text{NO} \rightarrow \text{CH}_3\text{O} + \text{NO}_2$       | $2.8 \cdot 10^{-12} e^{-300/T}$                                                                               | (Sander <i>et al.</i> , 2006)     |
| 192 | $\text{CH}_4 + \text{HS} \rightarrow \text{CH}_3 + \text{H}_2\text{S}$                  | $2.99 \cdot 10^{-31}$                                                                                         | (Kerr and Trotman-Dickenson 1957) |
| 193 | $\text{CH}_4 + \text{O} \rightarrow \text{CH}_3 + \text{OH}$                            | $8.75 \cdot 10^{-12} \times e^{-4330/T} \times (T/298)^{1.5}$                                                 | (Tsang and Hampson 1986)          |
| 194 | $\text{CH}_4 + \text{O}^1\text{D} \rightarrow \text{CH}_3 + \text{OH}$                  | $1.125 \cdot 10^{-10}$                                                                                        | (Sander <i>et al.</i> , 2006)     |
| 195 | $\text{CH}_4 + \text{O}^1\text{D} \rightarrow \text{H}_2\text{CO} + \text{H}_2$         | $7.5 \cdot 10^{-12}$                                                                                          | (Sander <i>et al.</i> , 2006)     |
| 196 | $\text{CH}_4 + \text{O}^1\text{D} \rightarrow \text{CH}_3\text{O} + \text{H}$           | $3.0 \cdot 10^{-11}$                                                                                          | (Sander <i>et al.</i> , 2006)     |
| 197 | $\text{CH}_4 + \text{OH} \rightarrow \text{CH}_3 + \text{H}_2\text{O}$                  | $2.45 \cdot 10^{-12} \times e^{-1775/T}$                                                                      | (Sander <i>et al.</i> , 2006)     |
| 198 | $\text{CO} + \text{O} + \text{M} \rightarrow \text{CO}_2 + \text{M}$                    | $2.2 \cdot 10^{-33} \times e^{-1780/T} \times \text{den}$                                                     | (Tsang and Hampson 1986)          |
| 199 | $\text{CO} + \text{OH} \rightarrow \text{CO}_2 + \text{H}$                              | $1.5 \cdot 10^{-13} \times (1 + 0.6 \times \text{den})$                                                       | (Sander <i>et al.</i> , 2006)     |
| 200 | $\text{CO} + \text{O}^1\text{D} \rightarrow \text{CO} + \text{O}$                       | $7.0 \cdot 10^{-11}$                                                                                          | (Sander <i>et al.</i> , 2006)     |
| 201 | $\text{H} + \text{CO} + \text{M} \rightarrow \text{HCO} + \text{M}$                     | $1.4 \cdot 10^{-34} \times e^{-100/T} \times \text{den}$                                                      | (Baulch <i>et al.</i> , 1994)     |
| 202 | $\text{H} + \text{H} + \text{M} \rightarrow \text{H}_2 + \text{M}$                      | $8.85 \cdot 10^{-33} \times (T/298)^{-0.6} \times \text{den}$                                                 | (Baulch <i>et al.</i> , 1994)     |
| 203 | $\text{H} + \text{HCO} \rightarrow \text{H}_2 + \text{CO}$                              | $1.8 \cdot 10^{-10}$                                                                                          | (Baulch <i>et al.</i> , 1992)     |
| 204 | $\text{H} + \text{HNO} \rightarrow \text{H}_2 + \text{NO}$                              | $3.01 \cdot 10^{-11} \times e^{500/T}$                                                                        | (Tsang and Herron 1991)           |
| 205 | $\text{H} + \text{HO}_2 \rightarrow \text{H}_2 + \text{O}_2$                            | $7.2 \cdot 10^{-12}$                                                                                          | (Sander <i>et al.</i> , 2006)     |
| 206 | $\text{H} + \text{HO}_2 \rightarrow \text{H}_2\text{O} + \text{O}$                      | $1.60 \cdot 10^{-12}$                                                                                         | (Sander <i>et al.</i> , 2006)     |
| 207 | $\text{H} + \text{HO}_2 \rightarrow \text{OH} + \text{OH}$                              | $7.12 \cdot 10^{-11}$                                                                                         | (Sander <i>et al.</i> , 2006)     |
| 208 | $\text{H} + \text{NO} + \text{M} \rightarrow \text{HNO} + \text{M}$                     | $2.1 \cdot 10^{-32} \times (T/298)^{1.00} \times \text{den}$                                                  | (Hampson and Garvin 1977)         |
| 209 | $\text{H} + \text{O}_2 + \text{M} \rightarrow \text{HO}_2 + \text{M}$                   | $5.7 \cdot 10^{-32} \times 7.5 \cdot 10^{-11} \times (T/298)^{1.6}$                                           | (Sander <i>et al.</i> , 2006)     |
| 210 | $\text{H} + \text{O}_3 \rightarrow \text{OH} + \text{O}_2$                              | $1.4 \cdot 10^{-10} \times e^{-470/T}$                                                                        | (Sander <i>et al.</i> , 2006)     |
| 211 | $\text{H} + \text{OH} + \text{M} \rightarrow \text{H}_2\text{O} + \text{M}$             | $6.8 \cdot 10^{-31} \times (T/300)^{-2} \times \text{den}$<br>$k_0 = 5.7 \cdot 10^{-32} \times (T/298)^{1.6}$ | (McEwan and Phillips 1975)        |
| 212 | $\text{H} + \text{SO} + \text{M} \rightarrow \text{HSO} + \text{M}$                     | $k_\infty = 7.5 \cdot 10^{-11}$                                                                               | (Kasting 1990)                    |

|     |                                                                                    |                                                                                                                                                                                                                    |                               |
|-----|------------------------------------------------------------------------------------|--------------------------------------------------------------------------------------------------------------------------------------------------------------------------------------------------------------------|-------------------------------|
| 213 | $\text{H}_2 + \text{O} \rightarrow \text{OH} + \text{H}$                           | $1.34 \cdot 10^{-15} \times e^{-1460/T} \times (T/298)^{6.52}$                                                                                                                                                     | (Robie <i>et al.</i> , 1990)  |
| 214 | $\text{H}_2 + \text{O}^1\text{D} \rightarrow \text{OH} + \text{H}$                 | $1.1 \cdot 10^{-10}$                                                                                                                                                                                               | (Sander <i>et al.</i> , 2006) |
| 215 | $\text{H}_2 + \text{OH} \rightarrow \text{H}_2\text{O} + \text{H}$                 | $5.5 \cdot 10^{-12} \times e^{-2000/T}$                                                                                                                                                                            | (Sander <i>et al.</i> , 2006) |
| 216 | $\text{H}_2\text{CO} + \text{H} \rightarrow \text{H}_2 + \text{HCO}$               | $2.14 \cdot 10^{-12} \times e^{-1090/T} \times (T/298)^{1.62}$                                                                                                                                                     | (Baulch <i>et al.</i> , 1994) |
| 217 | $\text{H}_2\text{CO} + \text{O} \rightarrow \text{HCO} + \text{OH}$                | $3.4 \cdot 10^{-11} \times e^{-1600/T}$                                                                                                                                                                            | (Sander <i>et al.</i> , 2006) |
| 218 | $\text{H}_2\text{CO} + \text{OH} \rightarrow \text{H}_2\text{O} + \text{HCO}$      | $5.5 \cdot 10^{-12} \times e^{125/T}$                                                                                                                                                                              | (Sander <i>et al.</i> , 2006) |
| 219 | $\text{H}_2\text{O} + \text{O}^1\text{D} \rightarrow \text{OH} + \text{OH}$        | $2.2 \cdot 10^{-10}$                                                                                                                                                                                               | (Sander <i>et al.</i> , 2006) |
| 220 | $\text{H}_2\text{O}_2 + \text{O} \rightarrow \text{OH} + \text{HO}_2$              | $1.4 \cdot 10^{-12} \times e^{-2000/T}$                                                                                                                                                                            | (Sander <i>et al.</i> , 2006) |
| 221 | $\text{H}_2\text{O}_2 + \text{OH} \rightarrow \text{HO}_2 + \text{H}_2\text{O}$    | $2.9 \cdot 10^{-12} \times e^{-160/T}$                                                                                                                                                                             | (Sander <i>et al.</i> , 2006) |
| 222 | $\text{H}_2\text{S} + \text{H} \rightarrow \text{H}_2 + \text{HS}$                 | $3.66 \cdot 10^{-12} \times e^{-455/T} \times (T/298)^{1.94}$                                                                                                                                                      | (Peng <i>et al.</i> , 1999)   |
| 223 | $\text{H}_2\text{S} + \text{O} \rightarrow \text{OH} + \text{HS}$                  | $9.2 \cdot 10^{-12} \times e^{-1800/T}$                                                                                                                                                                            | (Sander <i>et al.</i> , 2006) |
| 224 | $\text{H}_2\text{S} + \text{OH} \rightarrow \text{H}_2\text{O} + \text{HS}$        | $6.0 \cdot 10^{-12} \times e^{-70/T}$                                                                                                                                                                              | (Sander <i>et al.</i> , 2006) |
| 225 | $\text{HCO} + \text{H}_2\text{CO} \rightarrow \text{CH}_3\text{O} + \text{CO}$     | $3.8 \cdot 10^{-17}$                                                                                                                                                                                               | (Wen <i>et al.</i> , 1989)    |
| 226 | $\text{HCO} + \text{HCO} \rightarrow \text{H}_2\text{CO} + \text{CO}$              | $4.5 \cdot 10^{-11}$                                                                                                                                                                                               | (Tsang and Hampson 1986)      |
| 227 | $\text{HCO} + \text{NO} \rightarrow \text{HNO} + \text{CO}$                        | $1.3 \cdot 10^{-11}$                                                                                                                                                                                               | (Tsang and Hampson 1986)      |
| 228 | $\text{HCO} + \text{O}_2 \rightarrow \text{HO}_2 + \text{CO}$                      | $5.2 \cdot 10^{-12}$                                                                                                                                                                                               | (Sander <i>et al.</i> , 2006) |
| 229 | $\text{HNO}_2 + \text{OH} \rightarrow \text{H}_2\text{O} + \text{NO}_2$            | $1.8 \cdot 10^{-11} \times e^{-390/T}$<br>$7.2 \cdot 10^{-15} \times e^{-785/T} +$<br>$(1.9 \cdot 10^{-33} \times e^{725/T} \times \text{den}) /$<br>$(1 + 4.6 \cdot 10^{-16} \times e^{715/T} \times \text{den})$ | (Sander <i>et al.</i> , 2006) |
| 230 | $\text{HNO}_3 + \text{OH} \rightarrow \text{H}_2\text{O} + \text{NO}_2 + \text{O}$ | $k_0 = 2.3 \cdot 10^{-13} \times e^{590/T}$<br>$k_\infty = 1.7 \cdot 10^{-33} \times e^{1000/T}$                                                                                                                   | (Sander <i>et al.</i> , 2006) |
| 231 | $\text{HO}_2 + \text{HO}_2 \rightarrow \text{H}_2\text{O}_2 + \text{O}_2$          |                                                                                                                                                                                                                    | (Sander <i>et al.</i> , 2006) |
| 232 | $\text{HO}_2 + \text{O} \rightarrow \text{OH} + \text{O}_2$                        | $3.0 \cdot 10^{-11} \times e^{200/T}$                                                                                                                                                                              | (Sander <i>et al.</i> , 2006) |
| 233 | $\text{HO}_2 + \text{O}_3 \rightarrow \text{OH} + \text{O}_2 + \text{O}_2$         | $1.0 \cdot 10^{-14} \times e^{-490/T}$                                                                                                                                                                             | (Sander <i>et al.</i> , 2006) |
| 234 | $\text{HO}_2 + \text{NO}_2 \rightarrow \text{HNO}_2 + \text{O}_2$                  | $5.0 \cdot 10^{-16}$                                                                                                                                                                                               | (Sander <i>et al.</i> , 2006) |
| 235 | $\text{HS} + \text{H} \rightarrow \text{H}_2 + \text{S}$                           | $2.0 \cdot 10^{-11}$                                                                                                                                                                                               | (Schofield 1973)              |
| 236 | $\text{HS} + \text{HCO} \rightarrow \text{H}_2\text{S} + \text{CO}$                | $2.0 \cdot 10^{-11}$                                                                                                                                                                                               | (Kasting 1990)                |
| 237 | $\text{HS} + \text{HO}_2 \rightarrow \text{H}_2\text{S} + \text{O}_2$              | $1.0 \cdot 10^{-11}$                                                                                                                                                                                               | (Stachnik and Molina 1987)    |

|     |                                                                          |                                                                                                       |                                 |
|-----|--------------------------------------------------------------------------|-------------------------------------------------------------------------------------------------------|---------------------------------|
| 238 | $\text{HS} + \text{HS} \rightarrow \text{H}_2\text{S} + \text{S}$        | $2.0 \cdot 10^{-11}$                                                                                  | (Schofield 1973)                |
| 239 | $\text{HS} + \text{NO}_2 \rightarrow \text{HSO} + \text{NO}$             | $2.9 \cdot 10^{-11} \times e^{240/T}$                                                                 | (Sander <i>et al.</i> , 2006)   |
| 240 | $\text{HS} + \text{O} \rightarrow \text{H} + \text{SO}$                  | $7.0 \cdot 10^{-11}$                                                                                  | (Sander <i>et al.</i> , 2006)   |
| 241 | $\text{HS} + \text{O}_3 \rightarrow \text{HSO} + \text{O}_2$             | $9.0 \cdot 10^{-12} \times e^{-280/T}$                                                                | (Sander <i>et al.</i> , 2006)   |
| 242 | $\text{HS} + \text{S} \rightarrow \text{H} + \text{S}_2$                 | $1.0 \cdot 10^{-11}$                                                                                  | (Kasting 1990)                  |
| 243 | $\text{HSO} + \text{H} \rightarrow \text{H}_2 + \text{SO}$               | $1.0 \cdot 10^{-11}$                                                                                  | (Kasting 1990)                  |
| 244 | $\text{HSO} + \text{H} \rightarrow \text{HS} + \text{OH}$                | $2.0 \cdot 10^{-11}$                                                                                  | (Kasting 1990)                  |
| 245 | $\text{HSO} + \text{HS} \rightarrow \text{H}_2\text{S} + \text{SO}$      | $3.0 \cdot 10^{-12}$                                                                                  | (Kasting 1990)                  |
| 246 | $\text{HSO} + \text{O} \rightarrow \text{OH} + \text{SO}$                | $3.0 \cdot 10^{-11}$                                                                                  | (Kasting 1990)                  |
| 247 | $\text{HSO} + \text{OH} \rightarrow \text{H}_2\text{O} + \text{SO}$      | $3.0 \cdot 10^{-11}$                                                                                  | (Kasting 1990)                  |
| 248 | $\text{HSO} + \text{S} \rightarrow \text{HS} + \text{SO}$                | $1.0 \cdot 10^{-11}$                                                                                  | (Kasting 1990)                  |
| 249 | $\text{HSO}_3 + \text{O}_2 \rightarrow \text{HO}_2 + \text{SO}_3$        | $1.3 \cdot 10^{-12} \times e^{-330/T}$                                                                | (Sander <i>et al.</i> , 2006)   |
| 250 | $\text{N} + \text{NO} \rightarrow \text{N}_2 + \text{O}$                 | $2.1 \cdot 10^{-11} \times e^{-100/T}$                                                                | (Sander <i>et al.</i> , 2006)   |
| 251 | $\text{N} + \text{O}_2 \rightarrow \text{NO} + \text{O}$                 | $1.5 \cdot 10^{-12} \times e^{-3600/T}$                                                               | (Sander <i>et al.</i> , 2006)   |
| 252 | $\text{N} + \text{OH} \rightarrow \text{NO} + \text{H}$                  | $3.8 \cdot 10^{-11} \times e^{85/T}$                                                                  | (Atkinson <i>et al.</i> , 1989) |
| 253 | $\text{N} + \text{HO}_2 \rightarrow \text{NO} + \text{OH}$               | $2.2 \cdot 10^{-11}$                                                                                  | (Brune <i>et al.</i> 1983)      |
| 254 | $\text{NO} + \text{HO}_2 \rightarrow \text{NO}_2 + \text{OH}$            | $3.5 \cdot 10^{-12} \times e^{250/T}$                                                                 | (Sander <i>et al.</i> , 2006)   |
| 255 | $\text{NO} + \text{O} + \text{M} \rightarrow \text{NO}_2 + \text{M}$     | $9 \cdot 10^{-31} 3 \cdot 10^{-11} \times (T/298)^{1.5}$                                              | (Sander <i>et al.</i> , 2006)   |
| 256 | $\text{NO} + \text{O}_3 \rightarrow \text{NO}_2 + \text{O}_2$            | $2.0 \cdot 10^{-12} \times e^{-1500/T}$                                                               | (Sander <i>et al.</i> , 2006)   |
| 257 | $\text{NO} + \text{OH} + \text{M} \rightarrow \text{HNO}_2 + \text{M}$   | $k_0 = 7 \cdot 10^{-31} \times (T/298)^{2.6}$<br>$k_\infty = 3.6 \cdot 10^{-11} \times (T/298)^{0.1}$ | (Sander <i>et al.</i> , 2006)   |
| 258 | $\text{NO}_2 + \text{H} \rightarrow \text{NO} + \text{OH}$               | $4 \cdot 10^{-10} \times e^{-340/T}$                                                                  | (Sander <i>et al.</i> , 2006)   |
| 259 | $\text{NO}_2 + \text{O} \rightarrow \text{NO} + \text{O}_2$              | $5.6 \cdot 10^{-12} \times e^{180/T}$<br>$k_0 = 2.0 \cdot 10^{-30} \times (T/298)^{3.0}$              | (Sander <i>et al.</i> , 2006)   |
| 260 | $\text{NO}_2 + \text{OH} + \text{M} \rightarrow \text{HNO}_3 + \text{M}$ | $k_\infty = 2.5 \cdot 10^{-11}$                                                                       | (Sander <i>et al.</i> , 2006)   |
| 261 | $\text{O} + \text{HCO} \rightarrow \text{H} + \text{CO}_2$               | $5.0 \cdot 10^{-11}$                                                                                  | (Tsang and Hampson 1986)        |
| 262 | $\text{O} + \text{HCO} \rightarrow \text{OH} + \text{CO}$                | $1.0 \cdot 10^{-10}$                                                                                  | (Hampson and Garvin 1977)       |

|     |                                        |                                                                      |                                                |
|-----|----------------------------------------|----------------------------------------------------------------------|------------------------------------------------|
| 263 | $O + HNO \rightarrow OH + NO$          | $3.8 \cdot 10^{-11}$                                                 | (Tsang and Hampson 1986)                       |
| 264 | $O + O + M \rightarrow O_2 + M$        | $9.46 \cdot 10^{-34} \times e^{480/T} \times \text{den}$             | (Campbell and Gray 1973)                       |
| 265 | $O + O_2 + M \rightarrow O_3 + M$      | $6 \cdot 10^{-34} \times 3 \cdot 10^{-11} \times (T/298)^{2.40}$     | (Sander <i>et al.</i> , 2006)                  |
| 266 | $O + O_3 \rightarrow O_2 + O_2$        | $8.0 \cdot 10^{-12} \times e^{-2060/T}$                              | (Sander <i>et al.</i> , 2006)                  |
| 267 | $O^1D + M \rightarrow O + M$           | $1.8 \cdot 10^{-11} \times e^{110/T}$                                | (Sander <i>et al.</i> , 2006)                  |
| 268 | $O^1D + O_2 \rightarrow O + O_2$       | $3.2 \cdot 10^{-11} \times e^{70/T}$                                 | (Sander <i>et al.</i> , 2006)                  |
| 269 | $OH + HCO \rightarrow H_2O + CO$       | $1.0 \cdot 10^{-10}$                                                 | (Baulch <i>et al.</i> , 1992)                  |
| 270 | $OH + HNO \rightarrow H_2O + NO$       | $5 \cdot 10^{-11}$                                                   | (Sun <i>et al.</i> , 2001)                     |
| 271 | $OH + HO_2 \rightarrow H_2O + O_2$     | $4.8 \cdot 10^{-11} \times e^{250/T}$                                | (Sander <i>et al.</i> , 2006)                  |
| 272 | $OH + O \rightarrow H + O_2$           | $2.2 \cdot 10^{-11} \times e^{120/T}$                                | (Sander <i>et al.</i> , 2006)                  |
| 273 | $OH + O_3 \rightarrow HO_2 + O_2$      | $1.6 \cdot 10^{-12} \times e^{-940/T}$                               | (Sander <i>et al.</i> , 2006)                  |
| 274 | $OH + OH \rightarrow H_2O + O$         | $4.2 \cdot 10^{-12} \times e^{-240/T}$                               | (Sander <i>et al.</i> , 2006)                  |
| 275 | $OH + OH \rightarrow H_2O_2$           | $6.9 \cdot 10^{-31} \times 2.6 \cdot 10^{-11} \times (T/298)^{1.00}$ | (Sander <i>et al.</i> , 2006)                  |
| 276 | $S + HCO \rightarrow HS + CO$          | $1.0 \cdot 10^{-11}$                                                 | (Kasting 1990)                                 |
| 277 | $S + HO_2 \rightarrow HS + O_2$        | $5.0 \cdot 10^{-12}$                                                 | (Kasting 1990)                                 |
| 278 | $S + HO_2 \rightarrow SO + OH$         | $5.0 \cdot 10^{-12}$                                                 | (Kasting 1990)                                 |
| 279 | $S + O_2 \rightarrow SO + O$           | $2.3 \cdot 10^{-12}$                                                 | (Sander <i>et al.</i> , 2006)                  |
| 280 | $S + O_3 \rightarrow SO + O_2$         | $1.2 \cdot 10^{-11}$                                                 | (Sander <i>et al.</i> , 2006)                  |
| 281 | $S + OH \rightarrow SO + H$            | $6.6 \cdot 10^{-11}$                                                 | (Sander <i>et al.</i> , 2006)                  |
| 282 | $S + S + M \rightarrow S_2 + M$        | $1.98 \cdot 10^{-33} \times e^{-206/T} \times \text{den}$            | (Du <i>et al.</i> , 2008)                      |
| 283 | $S + S_2 + M \rightarrow S_3 + M$      | $2.8 \cdot 10^{-32} \times \text{den}$                               | (Kasting 1990)                                 |
| 284 | $S + S_3 + M \rightarrow S_4 + M$      | $2.8 \cdot 10^{-31} \times \text{den}$                               | (Kasting 1990)<br>(Hills <i>et al.</i> , 1987) |
| 285 | $S_2 + O \rightarrow S + SO$           | $1.1 \cdot 10^{-11}$                                                 |                                                |
| 286 | $S_2 + S_2 + M \rightarrow S_4 + M$    | $2.8 \cdot 10^{-31} \times \text{den}$                               | (Baulch <i>et al.</i> , 1976)                  |
| 287 | $S_4 + S_4 + M \rightarrow S_8AER + M$ | $2.8 \cdot 10^{-31} \times \text{den}$                               | (Kasting 1990)                                 |
| 288 | $SO + HCO \rightarrow HSO + CO$        | $5.6 \cdot 10^{-12} \times (T/298)^{-0.4}$                           | (Kasting 1990)                                 |

|     |                                                                          |                                                                                     |                                 |
|-----|--------------------------------------------------------------------------|-------------------------------------------------------------------------------------|---------------------------------|
| 289 | $\text{SO} + \text{NO}_2 \rightarrow \text{SO}_2 + \text{NO}$            | $1.4 \cdot 10^{-11}$                                                                | (Sander <i>et al.</i> , 2006)   |
| 290 | $\text{SO} + \text{O} + \text{M} \rightarrow \text{SO}_2 + \text{M}$     | $5.1 \cdot 10^{-31} \times \text{den}$                                              | (Sander <i>et al.</i> , 2006)   |
| 291 | $\text{SO} + \text{O}_2 \rightarrow \text{O} + \text{SO}_2$              | $2.6 \cdot 10^{-13} \times e^{-2400/T}$                                             | (Sander <i>et al.</i> , 2006)   |
| 292 | $\text{SO} + \text{O}_3 \rightarrow \text{SO}_2 + \text{O}_2$            | $4.5 \cdot 10^{-12} \times e^{-1170/T}$                                             | (Atkinson <i>et al.</i> , 2004) |
| 293 | $\text{SO} + \text{OH} \rightarrow \text{SO}_2 + \text{H}$               | $8.6 \cdot 10^{-11}$                                                                | (Sander <i>et al.</i> , 2006)   |
| 294 | $\text{SO} + \text{SO} \rightarrow \text{SO}_2 + \text{S}$               | $3.5 \cdot 10^{-15}$                                                                | (Martinez and Herron 1983)      |
| 295 | $\text{SO}_2 + \text{HO}_2 \rightarrow \text{SO}_3 + \text{OH}$          | $8.63 \cdot 10^{-16}$                                                               | (Lloyd 1974)                    |
| 296 | $\text{SO}_2 + \text{O} + \text{M} \rightarrow \text{SO}_3 + \text{M}$   | $k_0 = 1.3 \cdot 10^{-33} \times (T/298)^{-3.6}$<br>$k_\infty = 1.5 \cdot 10^{-11}$ | (Sander <i>et al.</i> , 2006)   |
| 297 | $\text{SO}_2 + \text{OH} + \text{M} \rightarrow \text{HSO}_3 + \text{M}$ | $k_0 = 3 \cdot 10^{-31} \times (T/298)^{3.3}$<br>$k_\infty = 1.5 \cdot 10^{-12}$    | (Sander <i>et al.</i> , 2006)   |
| 298 | $\text{SO}_2^1 + \text{O}_2 \rightarrow \text{SO}_3 + \text{O}$          | $1.0 \cdot 10^{-16}$                                                                | (Turco <i>et al.</i> , 1982)    |
| 299 | $\text{SO}_2^1 + \text{SO}_2 \rightarrow \text{SO}_3 + \text{SO}$        | $4.0 \cdot 10^{-12}$                                                                | (Turco <i>et al.</i> , 1982)    |
| 300 | $\text{SO}_2^3 + \text{SO}_2 \rightarrow \text{SO}_3 + \text{SO}$        | $7.0 \cdot 10^{-14}$                                                                | (Turco <i>et al.</i> , 1982)    |
| 301 | $\text{SO}_3 + \text{H}_2\text{O} \rightarrow \text{H}_2\text{SO}_4$     | $1.2 \cdot 10^{-15}$                                                                | (Sander <i>et al.</i> , 2006)   |
| 302 | $\text{SO}_3 + \text{SO} \rightarrow \text{SO}_2 + \text{SO}_2$          | $2.0 \cdot 10^{-15}$                                                                | (Chung <i>et al.</i> , 1975)    |
| 303 | $\text{SO}_2^1 + \text{h}\nu \rightarrow \text{SO}_2 + \text{h}\nu$      | $0.0 \cdot 10^0$                                                                    | (Turco <i>et al.</i> , 1982)    |
| 304 | $\text{SO}_2^1 + \text{h}\nu \rightarrow \text{SO}_2^3 + \text{h}\nu$    | $0.0 \cdot 10^0$                                                                    | (Turco <i>et al.</i> , 1982)    |
| 305 | $\text{SO}_2^3 + \text{h}\nu \rightarrow \text{SO}_2 + \text{h}\nu$      | $0.0 \cdot 10^0$                                                                    | (Turco <i>et al.</i> , 1982)    |
| 306 | $\text{O}_2 + \text{h}\nu \rightarrow \text{O} + \text{O}^1\text{D}$     | $2.38 \cdot 10^{-06}$                                                               |                                 |
| 307 | $\text{O}_2 + \text{h}\nu \rightarrow \text{O} + \text{O}$               | $4.77 \cdot 10^{-08}$                                                               |                                 |
| 308 | $\text{H}_2\text{O} + \text{h}\nu \rightarrow \text{H} + \text{OH}$      | $8.25 \cdot 10^{-06}$                                                               |                                 |
| 309 | $\text{O}_3 + \text{h}\nu \rightarrow \text{O}_2 + \text{O}^1\text{D}$   | $2.47 \cdot 10^{-03}$                                                               |                                 |
| 310 | $\text{O}_3 + \text{h}\nu \rightarrow \text{O}_2 + \text{O}$             | $7.37 \cdot 10^{-04}$                                                               |                                 |
| 311 | $\text{H}_2\text{O}_2 + \text{h}\nu \rightarrow \text{OH} + \text{OH}$   | $3.65 \cdot 10^{-05}$                                                               |                                 |
| 312 | $\text{CO}_2 + \text{h}\nu \rightarrow \text{CO} + \text{O}$             | $1.00 \cdot 10^{-09}$                                                               |                                 |
| 313 | $\text{H}_2\text{CO} + \text{h}\nu \rightarrow \text{H}_2 + \text{CO}$   | $2.51 \cdot 10^{-05}$                                                               |                                 |

|     |                                                                                |                       |
|-----|--------------------------------------------------------------------------------|-----------------------|
| 314 | $\text{H}_2\text{CO} + \text{h}\nu \rightarrow \text{HCO} + \text{H}$          | $2.86 \cdot 10^{-05}$ |
| 315 | $\text{CO}_2 + \text{h}\nu \rightarrow \text{CO} + \text{O}^1\text{D}$         | $2.90 \cdot 10^{-07}$ |
| 316 | $\text{HO}_2 + \text{h}\nu \rightarrow \text{OH} + \text{O}$                   | $2.17 \cdot 10^{-04}$ |
| 317 | $\text{CH}_4 + \text{h}\nu \rightarrow \text{CH}_2^1 + \text{H}_2$             | $2.08 \cdot 10^{-06}$ |
| 318 | $\text{C}_2\text{H}_6 + \text{h}\nu \rightarrow \text{CH}_4 + \text{CH}_2^1$   | $1.34 \cdot 10^{-06}$ |
| 319 | $\text{HNO}_2 + \text{h}\nu \rightarrow \text{NO} + \text{OH}$                 | $1.58 \cdot 10^{-09}$ |
| 320 | $\text{HNO}_3 + \text{h}\nu \rightarrow \text{NO}_2 + \text{OH}$               | $7.40 \cdot 10^{-05}$ |
| 321 | $\text{HNO} + \text{h}\nu \rightarrow \text{NO} + \text{N}$                    | $7.0 \cdot 10^{-04}$  |
| 322 | $\text{HCO} + \text{h}\nu \rightarrow \text{H} + \text{CO}$                    | $1.0 \cdot 10^{-02}$  |
| 323 | $\text{NO} + \text{h}\nu \rightarrow \text{N} + \text{O}$                      | $1.92 \cdot 10^{-06}$ |
| 324 | $\text{NO}_2 + \text{h}\nu \rightarrow \text{NO} + \text{O}$                   | $3.23 \cdot 10^{-03}$ |
| 325 | $\text{CH}_3 + \text{h}\nu \rightarrow \text{CH}_2^1 + \text{H}$               | $1.64 \cdot 10^{-01}$ |
| 326 | $\text{SO} + \text{h}\nu \rightarrow \text{S} + \text{O}$                      | $1.65 \cdot 10^{-04}$ |
| 327 | $\text{SO}_2 + \text{h}\nu \rightarrow \text{SO} + \text{O}$                   | $7.27 \cdot 10^{-05}$ |
| 328 | $\text{H}_2\text{S} + \text{h}\nu \rightarrow \text{HS} + \text{H}$            | $1.02 \cdot 10^{-04}$ |
| 329 | $\text{SO}_2 + \text{h}\nu \rightarrow \text{SO}_2^1$                          | $7.14 \cdot 10^{-04}$ |
| 330 | $\text{SO}_2 + \text{h}\nu \rightarrow \text{SO}_2^3$                          | $4.94 \cdot 10^{-07}$ |
| 331 | $\text{S}_2 + \text{h}\nu \rightarrow \text{S} + \text{S}$                     | $4.56 \cdot 10^{-04}$ |
| 332 | $\text{SO}_3 + \text{h}\nu \rightarrow \text{SO}_2 + \text{O}$                 | $1.57 \cdot 10^{-05}$ |
| 333 | $\text{SO}_2^1 + \text{h}\nu \rightarrow \text{SO}_2^3 + \text{h}\nu$          | $0.00 \cdot 10^0$     |
| 334 | $\text{SO}_2^1 + \text{h}\nu \rightarrow \text{SO}_2 + \text{h}\nu$            | $0.00 \cdot 10^0$     |
| 335 | $\text{SO}_2^3 + \text{h}\nu \rightarrow \text{SO}_2 + \text{h}\nu$            | $0.00 \cdot 10^0$     |
| 336 | $\text{HSO} + \text{h}\nu \rightarrow \text{HS} + \text{O}$                    | $2.17 \cdot 10^{-04}$ |
| 337 | $\text{S}_4 + \text{h}\nu \rightarrow \text{S}_2 + \text{S}_2$                 | $4.56 \cdot 10^{-04}$ |
| 338 | $\text{S}_3 + \text{h}\nu \rightarrow \text{S}_2 + \text{S}$                   | $4.45 \cdot 10^{-04}$ |
| 339 | $\text{C}_2\text{H}_2 + \text{h}\nu \rightarrow \text{C}_2\text{H} + \text{H}$ | $1.02 \cdot 10^{-06}$ |
| 340 | $\text{C}_2\text{H}_2 + \text{h}\nu \rightarrow \text{C}_2 + \text{H}_2$       | $4.65 \cdot 10^{-07}$ |

|     |                                              |                       |
|-----|----------------------------------------------|-----------------------|
| 341 | $C_2H_4 + hv \rightarrow C_2H_2 + H_2$       | $1.60 \cdot 10^{-05}$ |
| 342 | $C_3H_8 + hv \rightarrow C_3H_6 + H_2$       | $0.00 \cdot 10^{-00}$ |
| 343 | $C_3H_8 + hv \rightarrow C_2H_6 + CH_2^1$    | $1.43 \cdot 10^{-06}$ |
| 344 | $C_3H_8 + hv \rightarrow C_2H_4 + CH_4$      | $6.98 \cdot 10^{-06}$ |
| 345 | $C_3H_8 + hv \rightarrow C_2H_5 + CH_3$      | $3.69 \cdot 10^{-06}$ |
| 346 | $C_2H_6 + hv \rightarrow C_2H_2 + H_2 + H_2$ | $1.46 \cdot 10^{-06}$ |
| 347 | $C_2H_6 + hv \rightarrow C_2H_4 + H + H$     | $1.67 \cdot 10^{-06}$ |
| 348 | $C_2H_6 + hv \rightarrow C_2H_4 + H_2$       | $9.15 \cdot 10^{-07}$ |
| 349 | $C_2H_6 + hv \rightarrow CH_3 + CH_3$        | $4.31 \cdot 10^{-07}$ |
| 350 | $C_2H_4 + hv \rightarrow C_2H_2 + H + H$     | $1.67 \cdot 10^{-05}$ |
| 351 | $C_3H_6 + hv \rightarrow C_2H_2 + CH_3 + H$  | $1.07 \cdot 10^{-05}$ |
| 352 | $CH_4 + hv \rightarrow CH_2^3 + H + H$       | $3.94 \cdot 10^{-06}$ |
| 353 | $CH_4 + hv \rightarrow CH_3 + H$             | $1.93 \cdot 10^{-06}$ |
| 354 | $CH + hv \rightarrow C + H$                  | $3.27 \cdot 10^{-05}$ |
| 355 | $CH_2CO + hv \rightarrow CH_2^3 + CO$        | $1.53 \cdot 10^{-04}$ |
| 356 | $CH_3CHO + hv \rightarrow CH_3 + HCO$        | $3.25 \cdot 10^{-05}$ |
| 357 | $CH_3CHO + hv \rightarrow CH_4 + CO$         | $3.25 \cdot 10^{-05}$ |
| 358 | $C_2H_5CHO + hv \rightarrow C_2H_5 + HCO$    | $7.77 \cdot 10^{-05}$ |
| 359 | $C_3H_3 + hv \rightarrow C_3H_2 + H$         | $7.16 \cdot 10^{-04}$ |
| 360 | $CH_3C_2H + hv \rightarrow C_3H_3 + H$       | $1.75 \cdot 10^{-05}$ |
| 361 | $CH_3C_2H + hv \rightarrow C_3H_2 + H_2$     | $6.57 \cdot 10^{-06}$ |
| 362 | $CH_3C_2H + hv \rightarrow CH_3 + C_2H$      | $8.75 \cdot 10^{-07}$ |
| 363 | $CH_2CCH_2 + hv \rightarrow C_3H_3 + H$      | $1.91 \cdot 10^{-11}$ |
| 364 | $CH_2CCH_2 + hv \rightarrow C_3H_2 + H_2$    | $7.16 \cdot 10^{-12}$ |
| 365 | $CH_2CCH_2 + hv \rightarrow C_2H_2 + CH_2^3$ | $2.87 \cdot 10^{-12}$ |
| 366 | $C_3H_6 + hv \rightarrow CH_2CCH_2 + H_2$    | $1.80 \cdot 10^{-05}$ |
| 367 | $C_3H_6 + hv \rightarrow C_2H_4 + CH_2^3$    | $6.30 \cdot 10^{-07}$ |

|            |                                                                                       |                       |
|------------|---------------------------------------------------------------------------------------|-----------------------|
| <b>368</b> | $\text{C}_3\text{H}_6 + h\nu \rightarrow \text{C}_2\text{H} + \text{CH}_4 + \text{H}$ | $1.58 \cdot 10^{-06}$ |
| <b>369</b> | $\text{OCS} + h\nu \rightarrow \text{CO} + \text{S}$                                  | $8.71 \cdot 10^{-06}$ |
| <b>370</b> | $\text{CS}_2 + h\nu \rightarrow \text{CS} + \text{S}$                                 | $9.33 \cdot 10^{-04}$ |
| <b>371</b> | $\text{CS}_2 + h\nu \rightarrow \text{CS}_2^*$                                        | $9.71 \cdot 10^{-05}$ |

---
