# Supplementary material for: The Pale Orange Dot: The Spectrum and Habitability of Hazy Archean Earth
Source: PubMed Central journal article supplement — Astrobiology. 2016 Nov 1;16(11):873–99. doi: 10.1089/ast.2015.1422 (PMC5148108; doi:10.1089/ast.2015.1422), 2016-11-01
Supplement: Supp_Table2.pdf [file Supp_Table2.pdf]

Supplementary Table S2. Atmospheric species in the Archean photochemical code with lower boundary condition type and values. Lower boundary conditions are given in cm/s for deposition velocity (Vdep), a dimensionless mixing ratio by volume for fixed concentration ( $f_0$ ), and molecules/cm<sup>2</sup>/s for flux (flux). Species names ending in “AER” are types of aerosols.

| Species                        | Lower Boundary Type           | Vdep/ $f_0$ /flux     |
|--------------------------------|-------------------------------|-----------------------|
| Long-Lived Species             |                               |                       |
| O                              | constant deposition velocity  | 1                     |
| O <sub>2</sub>                 | constant mixing ratio         | $1 \cdot 10^{-08}$    |
| H <sub>2</sub> O               | constant deposition velocity  | 0                     |
| H                              | constant deposition velocity  | 1                     |
| OH                             | constant deposition velocity  | 1                     |
| HO <sub>2</sub>                | constant deposition velocity  | 1                     |
| H <sub>2</sub> O <sub>2</sub>  | constant deposition velocity  | $2 \cdot 10^{-01}$    |
| H <sub>2</sub>                 | constant deposition velocity* | $2.4 \cdot 10^{-04}$  |
| CO                             | constant deposition velocity  | $1.2 \cdot 10^{-04}$  |
| HCO                            | constant deposition velocity  | 1                     |
| H <sub>2</sub> CO              | constant deposition velocity  | $2 \cdot 10^{-01}$    |
| CH <sub>4</sub>                | constant mixing ratio         | variable <sup>†</sup> |
| CH <sub>3</sub>                | constant deposition velocity  | 1                     |
| C <sub>2</sub> H <sub>6</sub>  | constant deposition velocity  | 0                     |
| NO                             | constant deposition velocity  | $3 \cdot 10^{-04}$    |
| NO <sub>2</sub>                | constant deposition velocity  | $3 \cdot 10^{-03}$    |
| HNO                            | constant deposition velocity  | 1                     |
| O <sub>3</sub>                 | constant deposition velocity  | $7 \cdot 10^{-02}$    |
| HNO <sub>3</sub>               | constant deposition velocity  | $2 \cdot 10^{-01}$    |
| N                              | constant deposition velocity  | 0                     |
| H <sub>2</sub> S               | constant deposition velocity* | $2 \cdot 10^{-02}$    |
| HS                             | constant deposition velocity  | 0                     |
| S                              | constant deposition velocity  | 0                     |
| SO                             | constant deposition velocity  | 0                     |
| SO <sub>2</sub>                | constant deposition velocity* | 1                     |
| SO <sub>3</sub>                | constant deposition velocity  | 0                     |
| H <sub>2</sub> SO <sub>4</sub> | constant deposition velocity  | 1                     |
| HSO                            | constant deposition velocity  | 1                     |
| S <sub>2</sub>                 | constant deposition velocity  | 0                     |
| C <sub>2</sub>                 | constant deposition velocity  | 0                     |
| CH                             | constant deposition velocity  | 0                     |
| C <sub>2</sub> H               | constant deposition velocity  | 0                     |
| CH <sub>2</sub> <sup>3</sup>   | constant deposition velocity  | 0                     |
| C <sub>2</sub> H <sub>5</sub>  | constant deposition velocity  | 0                     |
| C <sub>2</sub> H <sub>2</sub>  | constant deposition velocity  | 0                     |
| C <sub>2</sub> H <sub>4</sub>  | constant deposition velocity  | 0                     |
| C <sub>3</sub> H <sub>8</sub>  | constant deposition velocity  | 0                     |
| C <sub>3</sub> H <sub>7</sub>  | constant deposition velocity  | 0                     |
| C <sub>3</sub> H <sub>5</sub>  | constant deposition velocity  | 0                     |
| C <sub>2</sub> H <sub>3</sub>  | constant deposition velocity  | 0                     |
| C <sub>3</sub> H <sub>6</sub>  | constant deposition velocity  | 0                     |

|                                   |                              |                        |
|-----------------------------------|------------------------------|------------------------|
| C <sub>3</sub> H <sub>2</sub>     | constant deposition velocity | 0                      |
| C <sub>3</sub> H <sub>3</sub>     | constant deposition velocity | 0                      |
| CH <sub>2</sub> CCH <sub>2</sub>  | constant deposition velocity | 0                      |
| CH <sub>2</sub> CO                | constant deposition velocity | 0                      |
| CH <sub>3</sub> CO                | constant deposition velocity | 0                      |
| CH <sub>3</sub> CHO               | constant deposition velocity | 0                      |
| CH <sub>3</sub> O                 | constant deposition velocity | 0                      |
| CH <sub>3</sub> O <sub>2</sub>    | constant deposition velocity | 0                      |
| C <sub>2</sub> H <sub>4</sub> OH  | constant deposition velocity | 0                      |
| C <sub>2</sub> H <sub>2</sub> OH  | constant deposition velocity | 0                      |
| C <sub>2</sub> H <sub>5</sub> CHO | constant deposition velocity | 0                      |
| CH <sub>3</sub> C <sub>2</sub> H  | constant deposition velocity | 0                      |
| CS <sub>2</sub>                   | constant deposition velocity | 0                      |
| HCS                               | constant deposition velocity | 0                      |
| OCS                               | constant deposition velocity | 0                      |
| CS                                | constant deposition velocity | 0                      |
| SO <sub>4</sub> AER               | constant deposition velocity | 1·10 <sup>-02</sup>    |
| S <sub>8</sub> AER                | constant deposition velocity | 1·10 <sup>-02</sup>    |
| HCAER                             | constant deposition velocity | 1·10 <sup>-02</sup>    |
| HCAER2                            | constant deposition velocity | 1·10 <sup>-02</sup>    |
| Short-Lived Species               |                              |                        |
| HNO <sub>2</sub>                  | constant deposition velocity | 0                      |
| O <sup>1</sup> D                  | constant deposition velocity | 0                      |
| CH <sub>2</sub> <sup>1</sup>      | constant deposition velocity | 0                      |
| C                                 | constant deposition velocity | 0                      |
| SO <sub>2</sub> <sup>1</sup>      | constant deposition velocity | 0                      |
| SO <sub>2</sub> <sup>3</sup>      | constant deposition velocity | 0                      |
| HSO <sub>3</sub>                  | constant deposition velocity | 0                      |
| OCS <sub>2</sub>                  | constant deposition velocity | 0                      |
| CS <sub>2</sub> <sup>*</sup>      | constant deposition velocity | 0                      |
| S <sub>3</sub>                    | constant deposition velocity | 0                      |
| S <sub>4</sub>                    | constant deposition velocity | 0                      |
| Inert Species                     |                              |                        |
| CO <sub>2</sub>                   | constant mixing ratio        | variable <sup>†</sup>  |
| N <sub>2</sub>                    | constant mixing ratio        | remainder <sup>‡</sup> |

\* - In addition to a constant deposition velocity, we also use a volcanic flux for these gases. Specifically, we used volcanic fluxes of  $3.5 \cdot 10^9$  molecules/cm<sup>2</sup>/s of H<sub>2</sub>,  $1 \cdot 10^{10}$  molecules/cm<sup>2</sup>/s of SO<sub>2</sub>, and  $3.5 \cdot 10^8$  molecules/cm<sup>2</sup>/s of H<sub>2</sub>S.

† - See text for information on these mixing ratios.

‡ - N<sub>2</sub> fills the remainder of the atmosphere.
